# Supplementary material for: Holstein Friesian dairy cattle edited for diluted coat color as a potential adaptation to climate change
Source: PubMed Central journal article supplement (PMC8626976; doi:10.1186/s12864-021-08175-z), 2021-11-26
Supplement: 12864_2021_8175_MOESM1_ESM.pdf [file 12864_2021_8175_MOESM1_ESM.pdf]

# **Supplementary material**

**Holstein Friesian dairy cattle edited for diluted coat color as a potential adaptation to climate change**

Götz Laible, Sally Cole, Brigid Brophy, Jingwei Wei, Shane Leath, Swati Jivanji, Mathew D.

Littlejohn and David N. Wells

**Table S1.** PCR primer, probe, gRNA and repair template sequences used to characterise the *PMEL* locus and white spotting genes.

| Name  | Sequence                                                                                                                                 | Application                         |
|-------|------------------------------------------------------------------------------------------------------------------------------------------|-------------------------------------|
| 122_F | GGCTCTGATGGGTGTTCTTC                                                                                                                     | gRNA, <i>PMEL</i>                   |
| 129_F | ATGGGTGTTCTTCTGGCTGT                                                                                                                     | gRNA, <i>PMEL</i>                   |
| 130_F | TGGGTGTTCTTCTGGCTGTA                                                                                                                     | gRNA, <i>PMEL</i>                   |
| ssODN | GGAGAGAAAAACCAGAGCAGGTGTGCAACCCCAAATTCACAC<br>TTGTTTCATGTCCAACATCCCACACTCACCTTCTGTGGTCCCTAC<br>AGCCAGAACACCCATCAGAGCCACATGGAGAAGGTATTTTC | HDR template, <i>PMEL</i>           |
| 1249  | TGCTTTAAGATGAGACTGACC                                                                                                                    | Mutation- specific PCR, <i>PMEL</i> |
| 1305  | AGCCAGAACACCCATCAG                                                                                                                       | Mutation- specific PCR, <i>PMEL</i> |
| 1283  | TTGCTGGAAGGAAGAACAGG                                                                                                                     | PCR/ddPCR primer, <i>PMEL</i>       |
| 1284  | GGAGACACCTGAAGCACTAC                                                                                                                     | PCR/ddPCR primer, <i>PMEL</i>       |
| 1287  | TGGGTGTTCTTCTGGCTGTAGGGACCACA                                                                                                            | Drop-off probe (HEX), <i>PMEL</i>   |
| 1285  | TGATGGGTGTTCTGGCTGTAGGGACCACA                                                                                                            | HDR probe (FAM), <i>PMEL</i>        |
| 1289  | GGCTCTGATGGGTGTTCTTCTGGCTGTAGGGACCACAG                                                                                                   | Dark probe, <i>PMEL</i>             |
| 1286  | TGCACACCTGCTCTGGTTTTTCTCTCCCT                                                                                                            | Reference probe (FAM), <i>PMEL</i>  |
| 1670  | CCAGCCACCCTCCCCTTCACC                                                                                                                    | PCR, <i>MC1R</i>                    |

|        |                          |                        |
|--------|--------------------------|------------------------|
| 1671   | CGCAATGATCCTCCACGCTCG    | PCR, <i>MC1R</i>       |
| 1041   | ACTATCATATGCTTACCGTAAC   | PCR, gRNA/Cas9 plasmid |
| 795    | GGGCCATTTACCGTCATTGA     | PCR, gRNA/Cas9 plasmid |
| 211    | TGCCCCAGAGAAGAGAAGG      | PCR, <i>LALBA</i>      |
| 212    | ATTGCTAACGGGAGTGAAGTAAGT | PCR, <i>LALBA</i>      |
| 1664   | GTGATTTGGGTCCCTCTGGG     | PCR, OFF 1             |
| 1665   | GCTGTGCCTAAGGTCCCAAT     | PCR, OFF 1             |
| 1666   | GCACGACTGAGGGACTTTCA     | PCR, OFF 2             |
| 1667   | AACTCATCTCCCGCTACCCT     | PCR, OFF 2             |
| 1668   | GGCCTTAGGGAGCAGACTTG     | PCR, OFF 3             |
| 1669   | TGGAATGTGTGGGCTCCATC     | PCR, OFF 3             |
| KIT_F  | TGGTGAAGGAGGCATGTCTG     | PCR, <i>KIT</i>        |
| KIT_R  | GGTGTGCCTTTGTGAATTCA     | PCR, <i>KIT</i>        |
| MITF_F | CGAGACACCACCGGAAACTT     | PCR, <i>MITF</i>       |
| MITF_R | TTCTGTGTTTGGAAAGGGGCC    | PCR, <i>MITF</i>       |
| PAX3_F | ATGTTAGGTGCAGGTGGAGC     | PCR, <i>PAX3</i>       |

PAX3\_R GCTTCCCACCTTGACCTCTC

PCR, PAX3

**Table S2.** Genotype for major-effect QTL associated with white spotting.

| QTL*       | ID          | Position ARS_UCD1.2 | Q allele <sup>+</sup> | q allele <sup>#</sup> | BEF2 gen <sup>@</sup> | CC14 gen <sup>&amp;</sup> |
|------------|-------------|---------------------|-----------------------|-----------------------|-----------------------|---------------------------|
| chr2_PAX3  | rs109979909 | chr2:110817975      | A                     | C                     | AC                    | AC                        |
| chr6_KIT   | rs451683615 | chr6:62557125       | A                     | G                     | AA                    | AA                        |
| chr22_MITF | rs209784468 | chr22:31651379      | A                     | G                     | AA                    | AA                        |

\* QTL from Jivanji et al. 2019; positions reference tag variant or candidate mutation

<sup>+</sup> Allele associated with increased spotting

<sup>#</sup> Allele associated with decreased spotting

<sup>@</sup> parental cell line

<sup>&</sup> edited cell line

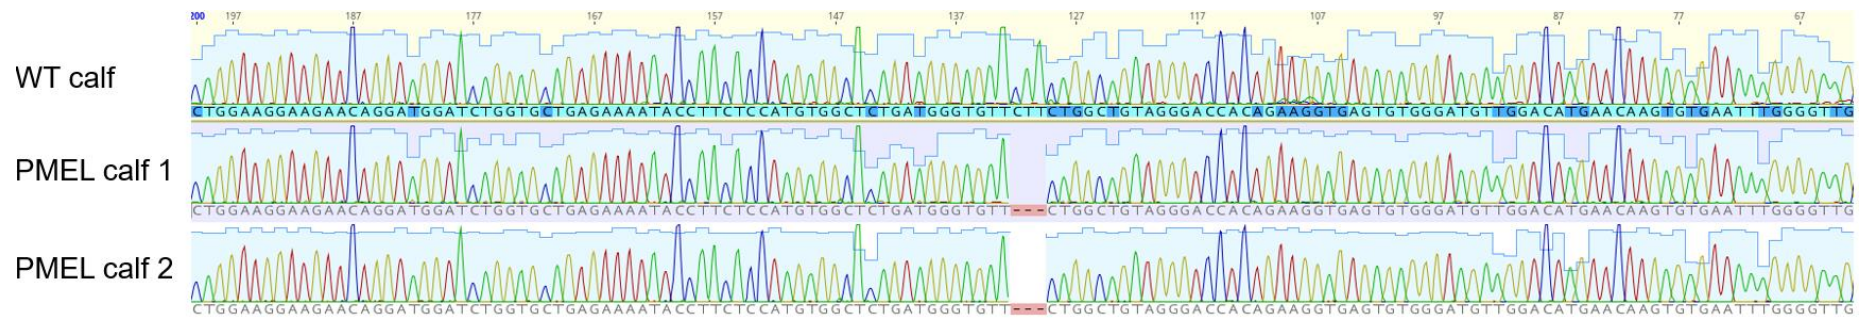

**Fig. S1. Target site sequence of the genome edited calves.** Shown is an alignment of Sanger sequence results of the *PMEL* target region of one wt calf and the two mutant calves, genome edited for the p.Leu18del *PMEL* mutation.

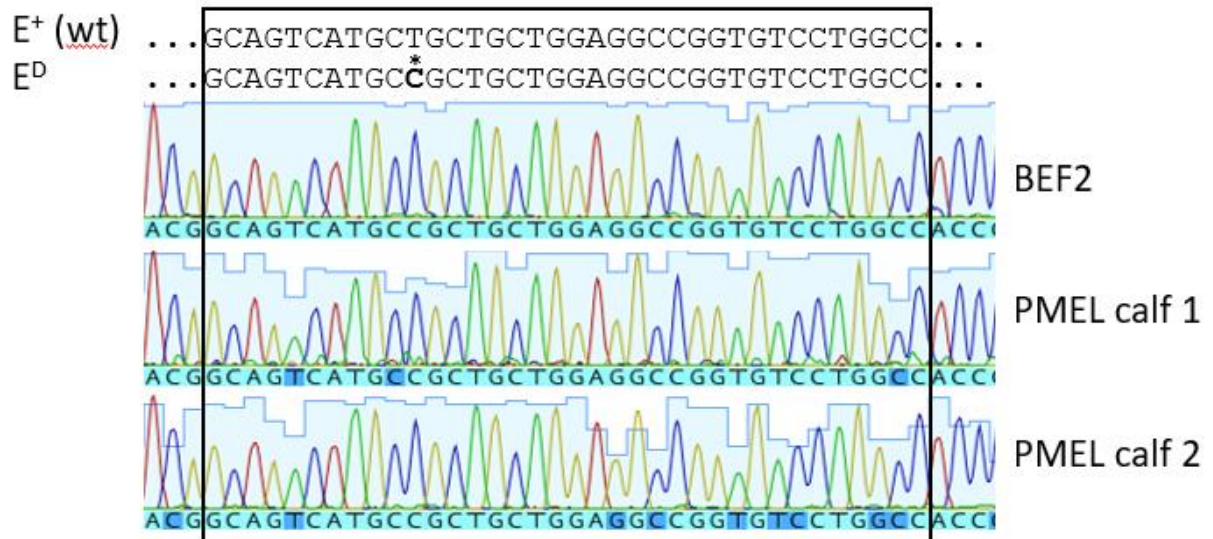

**Fig. S2. The edited clones are homozygous for the *MC1R*  $E^D$  allele.** Shown are the Sanger sequence results for the *MC1R* region covering the causative sequence variant of the  $E^D$  allele for the non-edited parental cell line BEF2 and the surviving calf (PMEL calf 1). For comparison, the sequence variation (bold, asterisk) between the  $E^+$  (wt) and  $E^D$  *MC1R* alleles is depicted at the top.

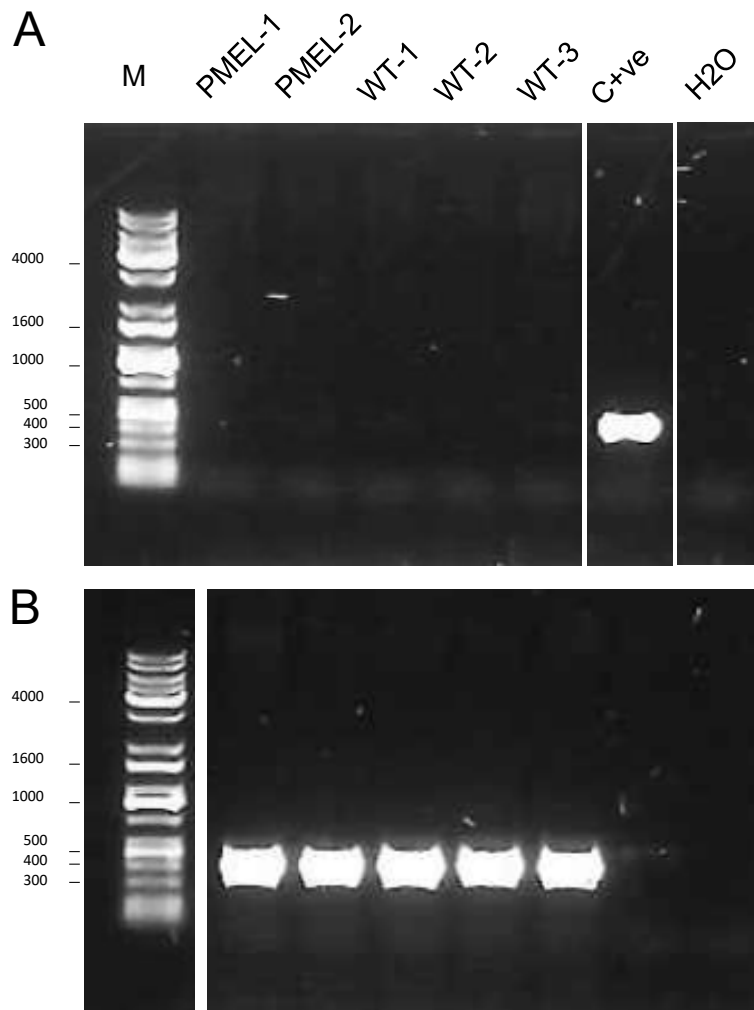

**Fig. S3. Absence of a plasmid-specific fragment in genomic DNA from edited calves.** (A) Shown are amplification results for a gRNA/Cas9 plasmid-specific amplicon with genomic DNA isolated from the two edited calves (PMEL-1, 2) and the three non-edited control calves (WT-1, 2, 3). M: DNA size marker; C+ve: positive control of gRNA/Cas9 plasmid; H<sub>2</sub>O: water control. (B) The same samples analysed for the amplification of a genomic fragment specific for the endogenous *LALBA* gene encoding alpha-lactalbumin. Please note, the pictures in panels A and B have been cropped and relevant lanes were assembled from the original gel photo (shown in Fig. S4) for clarity.

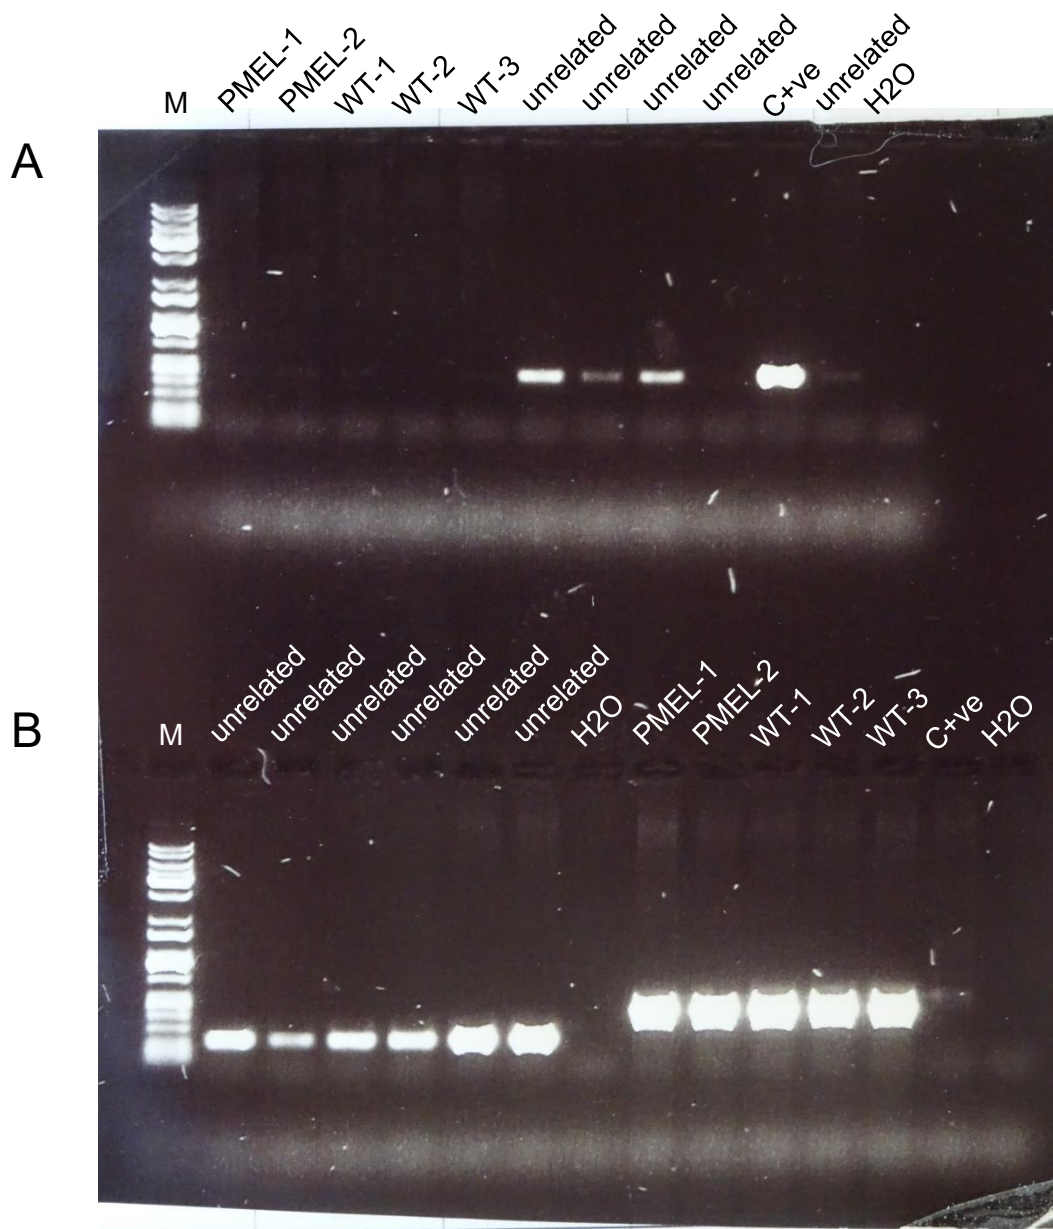

**Fig. S4. Original gel photo used to generate Fig. S3.** (A) Shown are amplification results for a gRNA/Cas9 plasmid-specific amplicon with genomic DNA isolated from the two edited calves (PMEL-1, 2) and the three non-edited control calves (WT-1, 2, 3). M: DNA size marker; C+ve: positive control of gRNA/Cas9 plasmid; H<sub>2</sub>O: water control. Lanes labelled as ‘unrelated’ show PCR results of an unrelated project in a different species. (B) The same specified samples as indicated above (PMEL, WT, C+ve), analysed for the amplification of a genomic fragment specific for the endogenous bovine *LALBA* gene encoding alpha-lactalbumin. Unrelated: PCR results of an unrelated project in a different species.



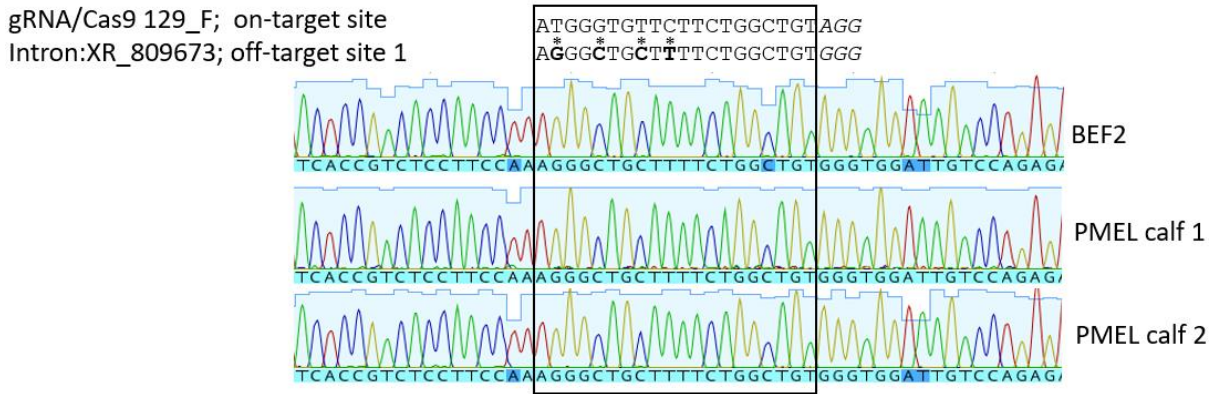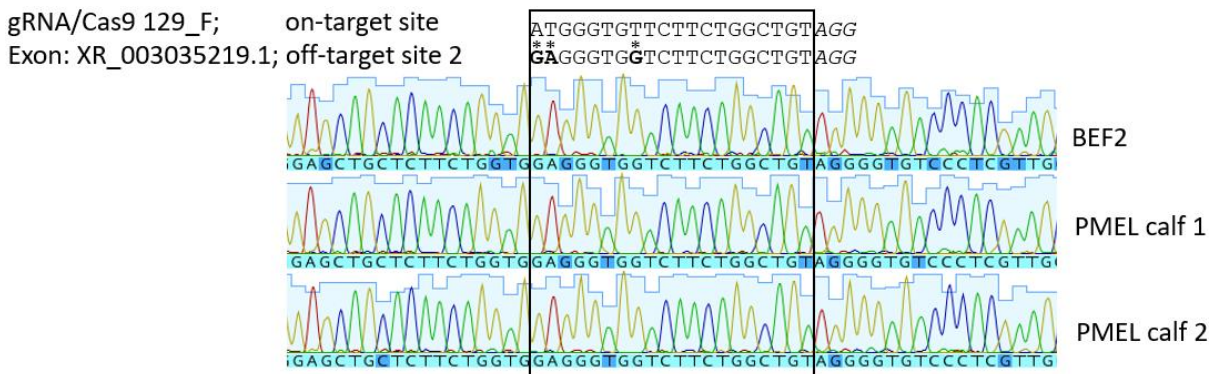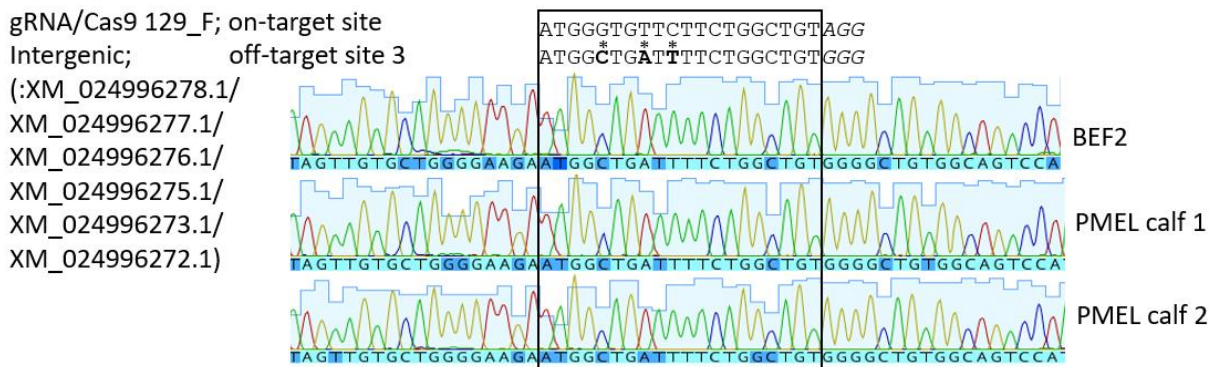

**Fig. S5. Absence of mutations at the top three predicted off-target sites.** An alignment of on-target sequence and each of the three off-target sites is given at the top. Differences to the on-target sequence are highlighted in bold and an asterisk. The corresponding PAM sequence is shown in italic. Below are the Sanger sequence results for the three predicted off-target sites for the non-edited parental cell line BEF2 and the two edited calves. The box indicates the potential Cas9/gRNA 129F binding site at the off-target site.

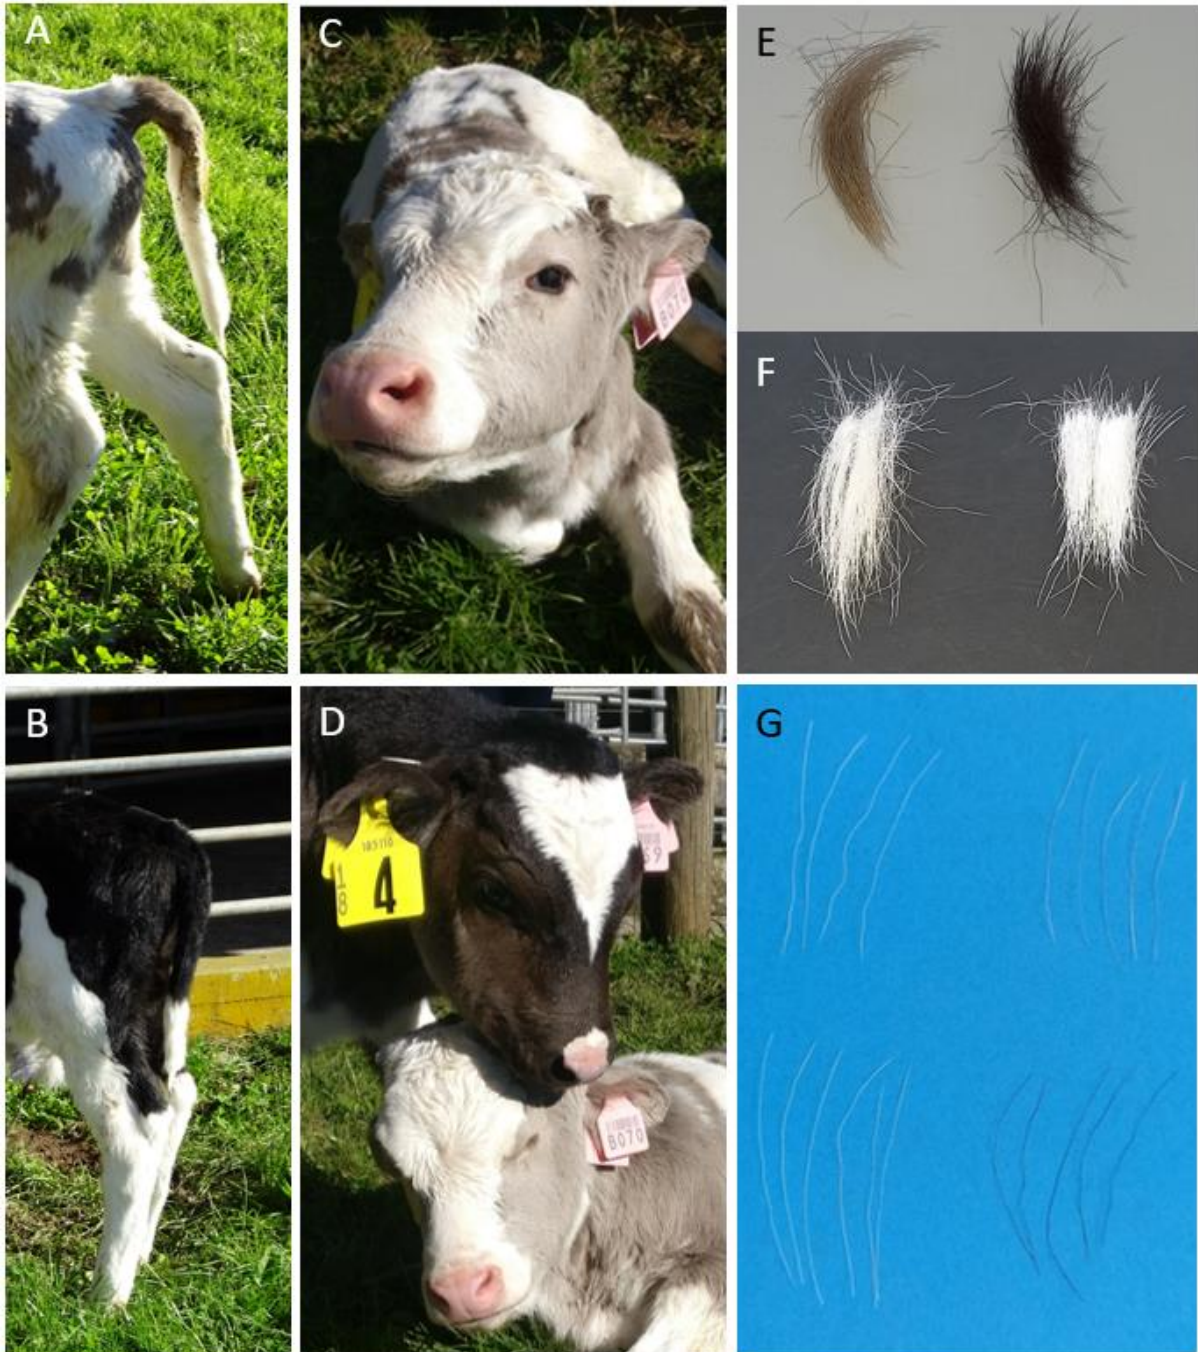

**Fig. S6. Absence of characteristic hair phenotypes associated with rat tail syndrome.**

The tails have a similar appearance with no apparent difference in developing tail switch between edited (A) and control calves (B); C, D) shows the presence of eye lashes and hair in the ears of edited and control calves; E, F, G) the difference in hair length between pigmented and non-pigmented areas is similar in edited and control calves. E: pigmented hair, edited left, control right; F: non-pigmented hair, edited left, control right; G: top (edited); left non-pigmented, right pigmented; bottom (control); left non-pigmented, right pigmented.
